# Supplementary material for: High-Throughput Sequencing of Arabidopsis microRNAs: Evidence for Frequent Birth and Death of MIRNA Genes
Source: PLoS One. 2007 Feb 14;2(2):e219. doi: 10.1371/journal.pone.0000219 (PMC1790633; doi:10.1371/journal.pone.0000219)
Supplement: Table S1 — Additional predicted targets for eight MIRNAs (0.02 MB XLS) [file pone.0000219.s001.xls]

## Sheet: Table S1
Table S1. Additional predicted targets for eight MIRNAs
MIRNA family	Predicted targetsa
miR472	At1g12210 (2.5), At5g63020 (2.5), At1g12220 (3), At1g15890 (3), At4g10780 (3), At5g43730 (3), At1g12280 (3.5), At5g47260 (3.5)
miR825	At5g44970 (3.5)
miR842	At1g52100 (3.5), At5g28520 (3.5), At1g52070 (3.5)
miR846	At1g57570 (3)b, At1g52130 (3), At1g33790 (3), At1g60110 (3.5), At5g28520 (3.5), At1g52070 (3.5), At1g52050 (3.5), At1g52060 (3.5)
miR858	At1g06180 (3), At5g49330 (3), At1g66230 (3), At4g12350 (3), At3g62610 (3.5), At3g24310 (3.5)
miR859	At2g18780 (1.5), At5g36820 (1.5), At5g36730 (1.5), At3g17570 (1.5), At3g22350 (1.5), At3g16880 (1.5), At3g22710 (1.5), At3g16820 (1.5), At3g21170 (2.5), At3g49520 (2.5), At3g24580 (2.5), At2g27520 (2.5), At3g13820 (2.5), At3g13830 (3), At3g22700 (3), At1g11810 (3), At3g19880 (3.5), At3g17280 (3.5), At2g04920 (3.5), At1g25054 (3.5), At1g25141 (3.5), At1g25210 (3.5), At1g24793 (3.5), At1g24880 (3.5…
miR865-3p	At3g02340 (3.5), At3g10160 (3.5),At1g05680 (3.5), At1g31290 (3.5), At1g64880 (3.5), At5g67450 (3.5)
miR866-3p	At1g09680 (3), At2g22070 (3.5), At3g05380 (3.5), At5g18370 (3.5)
aRemaining predicted targets from Table 2 with a score of 3.5 or less. Target score is given in parentheses.
bTarget tested but not validated by 5'RACE.
