# Supplementary material for: High-Throughput Sequencing of Arabidopsis microRNAs: Evidence for Frequent Birth and Death of MIRNA Genes
Source: PLoS One. 2007 Feb 14;2(2):e219. doi: 10.1371/journal.pone.0000219 (PMC1790633; doi:10.1371/journal.pone.0000219)
Supplement: Table S2 — Summary of MIRNA foldback sequences. (0.02 MB XLS) [file pone.0000219.s002.xls]

## Sheet: Table S2
Table S2. Summary of MIRNA foldback sequences.
MIRNA family	Location of foldbacka	Location of small RNAa	Strand	ΔG (kcal/mol)
miR472	1:4182133..4182294	1:4182141..4182162	-1	-54.8
miR771	3:19670274..19670397	3:19670359..19670380	-1	-55.4
miR773	1:13067199..13067342	1:13067291..13067312	1	-61.2
miR774	1:22153601..22153698	1:22153670..22153690	1	-40.4
miR775	1:29427347..29427465	1:29427439..29427458	1	-41.33
miR776	1:22799293..22799391	1:22799364..22799385	1	-41.7
miR777	1:26641663..26641770	1:26641746..26641767	1	-39.8
miR778	2:17356515..17356652	2:17356626..17356646	-1	-79.7
miR779	2:9567831..9568011	2:9567982..9568003	1	-71.6
miR780.1	4:8504127..8504318	4:8504161..8504181	-1	-71.6
miR780.2		4:8504140..8504160
miR781	1:7423507..7423600	1:7423512..7423532	1	-42
miR823	3:4496829..4496925	3:4496833..4496853	-1	-42.3
miR824	4:12625121..12625766	4:12625138..12625158	1	-187.02
miR825	2:11166780..11166881	2:11166852..11166872	1	-42.1
miR827	3:22133773..22133876	3:22133788..22133808	-1	-35.3
miR829.1	1:11834048..11834160	1:11834074..11834097	-1	-60.5
miR830-5p	1:4820402..4820496	1:4820470..4820491	-1	-26.25
miR830-3p		1:4820403..4820423
miR833-3p	1:29530087..29530187	1:29530158..29530179	1	-57.5
miR833-5p		1:29530097..29530117
miR840	2:771376..771521	2:771491..771512	-1	-74.4
miR842	1:22580778..22580884	1:22580859..22580879	1	-51.5
miR843	3:17753094..17753276	3:17753132..17753152	1	-87.1
miR844	2:9949273..9949373	2:9949343..9949363	-1	-47.4
miR845a	4:12217457..12217537	4:12217467..12217487	-1	-42.4
miR845b	4:12214079..12214177	4:12214096..12214117	-1	-41.1
miR846	1:22581082..22581356	1:22581327..22581347	1	-94.7
miR851-5p	3:19670549..19670654	3:19670624..19670644	-1	-56.2
miR852	4:8336203..8336327	4:8336298..8336319	1	-65.4
miR853	3:8346400..8346646	3:8346423..8346444	1	-85.2
miR856	1:11957440..11957710	1:11957467..11957488	1	-110.6
miR857	4:7878181..7878557	4:7878194..7878214	-1	-116.86
miR858	1:26777201..26777387	1:26777357..26777377	-1	-49.34
miR859	1:22153383..22153508	1:22153400..22153420	1	-63.42
miR860	5:9098794..9098919	5:9098879..9098899	1	-64.7
miR861-3p	3:17849120..17849251	3:17849139..17849159	-1	-56.3
miR861-5p		3:17849208..17849228
miR862-5p	2:10725175..10725277	2:10725185..10725205	1	-62.7
miR862-3p		2:10725249..10725269
miR863-3p	4:7846593..7846895	4:7846831..7846851	1	-140.2
miR863-5p		4:7846640..7846660
miR864-5p	1:6740491..6740582	1:6740494..6740514	1	-26.27
miR864-3p		1:6740560..6740581
miR865-5p	5:5169993..5170134	5:5170001..5170021	1	-43
miR865-3p		5:5170100..5170120
miR866-3p	5:16175051..16175176	5:16175066..16175085	-1	-58.6
miR866-5p		5:16175159..16175139
miR867	4:11375375..11375492	4:11375398..11375418	1	-39.1
miR868	3:6488240..6488432	3:6488405..6488425	1	-83.7
miR869.1	5:15908807..15909101	5:15908842..15908862	-1	-163.1
miR869.2		5:15908853..15908873
miR870	5:21412771..21412855	5:21412771..21412791	-1	-42.2
aCoordinates are listed as chromosome:start nt..end nt.
