# Supplementary material for: High-Throughput Sequencing of Arabidopsis microRNAs: Evidence for Frequent Birth and Death of MIRNA Genes
Source: PLoS One. 2007 Feb 14;2(2):e219. doi: 10.1371/journal.pone.0000219 (PMC1790633; doi:10.1371/journal.pone.0000219)
Supplement: Table S3 — MIRNA loci with sequence similarity to protein-coding genes. (0.02 MB XLS) [file pone.0000219.s003.xls]

## Sheet: Table S3
Table S3. MIRNA loci with sequence similarity to protein-coding genes.
	Foldback-similar genes				Best predicted target genes
miRNA	Genea	Gene family	Target score		Genea	Gene family	Target score
miR161.1b	At5g41170	Pentatricopeptide repeat	3.5		At1g63400	Pentatricopeptide repeat	2.5
					At1g63130	Pentatricopeptide repeat	2.5
					At1g63080	Pentatricopeptide repeat	2.5
					At1g62910c	Pentatricopeptide repeat	2.5
					At1g64580	Pentatricopeptide repeat	2.5
					At1g62670	Pentatricopeptide repeat	2.5
					At1g62930	Pentatricopeptide repeat	2.5
miR161.2b	At5g41170	Pentatricopeptide repeat	1		At5g41170	Pentatricopeptide repeat	1
					At1g62590	Pentatricopeptide repeat	1
					At1g63330	Pentatricopeptide repeat	1
miR163b	At1g66690	S-adenosyl-L-methionine:carboxyl methyltransferase	1		At1g66690	S-adenosyl-L-methionine:carboxyl methyltransferase	1
					At1g66700	S-adenosyl-L-methionine:carboxyl methyltransferase	1
miR447ab	At3g12000	S-locus related	11		At5g60760	2-phosphoglycerate kinase-related	2
miR447cb	At4g21370	S-locus protein kinase	10.5		At5g42870	Lipin	3.5
miR778b	At2g22740 (SUVH6)	H3K9 methyltransferase	1.5		At2g22740 (SUVH6)	H3K9 methyltransferase	1.5
miR780	At5g41610 (CHX18)	Sodium hydrogen antiporter	3.5		At5g41610 (CHX18)	Sodium hydrogen antiporter	3.5
miR824	At3g57230 (AGL16)	MADS-box	0.5		At3g57230 (AGL16)	MADS-box	0.5
miR833-5p	At3g11000	Development and cell death domain	6.5		At1g77650c	F-box	3.5
miR843	At3g48340	Cysteine proteinase	14.5		At3g13830c	F-box	0.5
miR846b	At1g57570c	Jacalin lectin	3		At2g25980c	Jacalin lectin	2.5
					At5g49850	Jacalin lectin	2.5
					At5g49870c	Jacalin lectin	2.5
miR853	At3g13940	A49-like RNA Polymerase I associated factor	16		At5g08010c	Unclassified	4
miR856	At2g46800 (ZAT1)c	Zinc transporter	2.5		At5g41610 (CHX18)	Sodium hydrogen antiporter	1
miR859b	At3g17265c	F-box	0.5		At3g17265c	F-box	0.5
miR862	At2g25170 (PKL)	Chromatin remodeling factor	7.5		At5g11530 (EMF1)c	Embryonic flower 1	4
miR866-5p	At4g00610	DNA-binding storekeeper	5		At4g21700c	Unclassified	3
miR869bd	At2g33290 (SUVH2)	H3K9 methyltransferase	8		At1g22400 (UGT85A1)	UDP-glucoronosyl/UDP-glucosyl transferase	4.5
					At1g71230 (AJH2)	COP9 signalosome subunit 5A	4.5
aGenes in bold were validated for miRNA-guided cleavage by 5' RACE.
bMIRNA locus has significant similarity to multiple genes in the same family.
cTarget was tested but failed the validation assay.
dTargts predicted for miRNA*
